# Supplementary material
Source: PubMed Central journal article supplement (PMC8239872)

## **Current and past infections of hepatitis B virus do not increase mortality in patients with COVID-19**

Terry Cheuk-Fung Yip, Vincent Wai-Sun Wong, Grace Chung-Yan Lui, Viola Chi-Ying Chow, Yee-Kit Tse, Vicki Wing-Ki Hui, Lilian Yan Liang, Henry Lik-Yuen Chan, David Shu-Cheong Hui, Grace Lai-Hung Wong

### **Supplementary Materials**

#### **Table of contents**

|                             |       |
|-----------------------------|-------|
| Supplementary methods.....  | 2-3   |
| Supplementary Table 1.....  | 4     |
| Supplementary Table 2.....  | 5     |
| Supplementary Table 3.....  | 6-8   |
| Supplementary Table 4.....  | 9     |
| Supplementary Table 5.....  | 10    |
| Supplementary Table 6.....  | 11-12 |
| Supplementary Figure 1..... | 13-14 |

## **SUPPLEMENTARY METHODS**

### **Clinical evaluation**

All Coronavirus disease 2019 (COVID-19) patients were admitted to medical wards or intensive care units with isolation facilities. Initial investigations included a complete blood count (with a differential count), clotting profile (prothrombin time, activated partial-thromboplastin time, international normalized ratio) and serum biochemical measurements (electrolytes, renal and liver biochemistries, C-reactive protein and lactate dehydrogenase, glucose and procalcitonin). These laboratory assessments and chest radiography were performed regularly as clinically indicated. A real-time reverse-transcriptase polymerase chain reaction (RT-PCR) assay was used to detect a conserved region in the E gene of severe acute respiratory syndrome-coronavirus (SARS-CoV) and SARS-CoV-2 as well as other bat-associated SARS-related viruses (*Sarbecovirus*) as screening.(1) All positive samples were sent out to Public Health Laboratory Services Branch Centre For Health Protection, Department Of Health for confirmation by real-time RT-PCR targeting at SAR-CoV-2 specific RNA-dependent-RNA-polymerase gene region. Microbiological workup, including sputum and blood bacterial culture, nasopharyngeal aspirate for respiratory viruses and atypical pathogens, and urine for *Streptococcus pneumoniae* and *Legionella* antigen tests, were performed as appropriate.

### **Clinical management of COVID-19**

Antibacterial therapy, using a beta-lactam-beta-lactamase inhibitor, or third generation cephalosporin with or without a macrolide or doxycycline, was initiated if bacterial infection is suspected or confirmed.(2) Supportive therapy, including supplemental

oxygen, intravenous fluid, vasopressor support, mechanical ventilation, and renal replacement therapy, were given as appropriate. COVID-19 patients were either recruited into clinical trials (NCT04276688, NCT04292730, NCT04292899), or started lopinavir-ritonavir (Kaletra® 200mg/50mg) monotherapy or in combination with ribavirin (400mg twice daily) for up to 14 days, and/or interferon beta-1b, according to local interim guidelines. Systemic corticosteroids were not given routinely, but in selected patients, e.g. those with refractory shock. Patients were discharged when they improved clinically and with two consecutive clinical specimens tested negative for SARS-CoV-2.

## REFERENCES

- [1] Zhu N, Zhang D, Wang W, Li X, Yang B, Song J, et al. A Novel Coronavirus from Patients with Pneumonia in China, 2019. *N Engl J Med* 2020;382:727-733.
- [2] Ho PL, Wu TC. Reducing bacterial resistance with IMPACT – Interhospital Multi-disciplinary Programme on Antimicrobial ChemoTherapy, 5th Edition 2017. Website:  
[https://www.chp.gov.hk/files/pdf/reducing\\_bacterial\\_resistance\\_with\\_impact.pdf](https://www.chp.gov.hk/files/pdf/reducing_bacterial_resistance_with_impact.pdf).  
Accessed on 4 April 2021.

Supplementary Table 1. List of diagnosis codes and/or virological assays to define coronavirus disease 2019 (COVID-19)/ severe acute respiratory syndrome coronavirus 2 (SARS-CoV-2) infection.

| <b>ICD-9-CM Code</b>                                                        | <b>All Diagnosis Description</b>             |
|-----------------------------------------------------------------------------|----------------------------------------------|
| 079.89                                                                      | Infection due to coronavirus (079.89:3)      |
| 480.8                                                                       | Pneumonia due to coronavirus (480.8:1)       |
| 519.8                                                                       | COVID-19 (519.8:8)                           |
| 519.8                                                                       | Respiratory infection by 2019 nCoV (519.8:8) |
| <b>Virological Test Description</b>                                         |                                              |
| 2019 novel Coronavirus (2019-nCoV) PCR                                      |                                              |
| SARS and SARS related coronaviruses RNA                                     |                                              |
| RT-PCR for Novel coronavirus (Novel CoV) RNA                                |                                              |
| RT-PCR for severe acute respiratory syndrome coronavirus 2 (SARS-CoV-2) RNA |                                              |
| Novel coronavirus (Novel-CoV) RNA                                           |                                              |

COVID-19 = coronavirus disease 2019; ICD-9-CM = International Classification of Diseases; Ninth Revision, Clinical Modification; nCoV = novel coronavirus; RT-PCR = Reverse transcription polymerase chain reaction; SARS-CoV-2 = severe acute respiratory syndrome coronavirus 2.

Supplementary Table 2. Medications used in Hospital Authority internally.

| <b>Drug code</b>        | <b>Name</b>                | <b>Dosage</b>                                        |
|-------------------------|----------------------------|------------------------------------------------------|
| <b>Antiviral</b>        |                            |                                                      |
| KALE02/03               | Kaletra (or equiv)         | 200 MG / 50 MG                                       |
| OSEL01/04/05/10/14      | Oseltamivir (phosphate)    | 30 MG, 40 MG, 75 MG, 6MG/ML                          |
| RIBA06/09               | Ribavirin                  | 200 MG, 100MG/ML                                     |
| <b>Antibiotics</b>      |                            |                                                      |
| AUGM01/02/04/05/06/08   | Augmentin (or equiv)       | 375MG, 156MG/5ML, 1.2G<br>1G, 457MG/5ML, 642.9MG/5ML |
| AZIT02/03/04            | Azithromycin               | 200MG/5ML, 500MG, 250MG                              |
| CEFA08                  | Cefazolin (sodium)         | 1G                                                   |
| CEFE04                  | Cefepime hcl               | 1G                                                   |
| CEFO04                  | Cefotaxime (sodium)        | 1G                                                   |
| CEFP01                  | Cefpodoxime (proxetil)     | 100MG                                                |
| CEFT01/02               | Ceftazidime                | 500MG, 1G                                            |
| CEFT14                  | Ceftriaxone disodium       | 1G                                                   |
| CEFU02/04/07            | Cefuroxime (sodium)        | 750MG, 250MG,<br>125MG/5ML                           |
| LEVO09/10/14/15/18      | Levofloxacin               | 100MG, 0.2G/ML,<br>330MG, 5MG/ML, 250MG              |
| CIPR01                  | Ciprofloxacin (hcl)        | 250MG, 2MG/ML                                        |
| MERO01/02               | Meropenem                  | 500MG, 1G                                            |
| ERTA01                  | Ertapenem                  | 1G                                                   |
| ERYT03/05, NOT 01       | Erythromycin               | 200MG/5ML, 250MG                                     |
| COTR01                  | Cotrimoxazole              | 480MG, 240MG/5ML                                     |
| <b>Antifungal</b>       |                            |                                                      |
| NYST02                  | Nystatin                   | 100000U/ML                                           |
| FLUC02/03/05/06         | Fluconazole                | 50MG, 150MG<br>2MG/ML, 50MG/5ML                      |
| ITRA01                  | Itraconazole               | 100MG                                                |
| <b>Corticosteroid</b>   |                            |                                                      |
| METH30                  | Methylprednisolone         | 500MG                                                |
| PRED01/02/19/29         | Prednisolone               | 1MG, 5MG<br>25MG, 5MG/ML                             |
| HYDR06/07/25/26/30/38   | Hydrocortisone             | 20MG, 100MG<br>10MG, 25MG<br>25MG, 2MG/ML            |
| <b>Immunomodulators</b> |                            |                                                      |
| NORM15/20/21            | Intravenous immunoglobulin | 60G/L, 50MG/ML                                       |
| INTE20                  | Interferon beta-1b         | 8MIU (250MCG)/ML                                     |

Supplementary Table 3. International Classification of Diseases, Ninth Revision, Clinical Modification (ICD-9-CM) diagnosis and procedure codes for comorbidities.

| Disease                                                                 | ICD-9-CM Code | Description                                              |
|-------------------------------------------------------------------------|---------------|----------------------------------------------------------|
| <b>Cardiovascular diseases</b>                                          |               |                                                          |
| Hypertension and hypertensive diseases                                  | 401           | Essential hypertension                                   |
|                                                                         | 402           | Hypertensive heart disease                               |
|                                                                         | 403           | Hypertensive chronic kidney disease                      |
|                                                                         | 404           | Hypertensive heart and chronic kidney disease            |
|                                                                         | 405           | Secondary hypertension                                   |
| Ischemic heart disease                                                  | 410           | Acute myocardial infarction                              |
|                                                                         | 411           | Other acute and subacute forms of ischemic heart disease |
|                                                                         | 412           | Old myocardial infarction                                |
|                                                                         | 413           | Angina pectoris                                          |
| Cardiac dysrhythmias                                                    | 414           | Other forms of chronic ischemic heart disease            |
|                                                                         | 427           | Cardiac dysrhythmias                                     |
| Heart failure                                                           | 428           | Heart failure                                            |
| <b>Digestive diseases</b>                                               |               |                                                          |
| Peptic ulcer                                                            | 530.2         | Ulcer of esophagus                                       |
|                                                                         | 531           | Gastric ulcer                                            |
|                                                                         | 532           | Duodenal ulcer                                           |
|                                                                         | 533           | Peptic ulcer site unspecified                            |
|                                                                         | 534           | Gastrojejunal ulcer                                      |
|                                                                         | 070.2-3       | Chronic hepatitis B                                      |
|                                                                         | 070.41, 44    | Hepatitis C with hepatic coma                            |
|                                                                         | 070.51, 54    | Hepatitis C without mention of hepatic coma              |
|                                                                         | V02.61        | Hepatitis B carrier                                      |
|                                                                         | V02.62        | Hepatitis C carrier                                      |
| Chronic liver disease, liver failure, liver cirrhosis and complications | 070.42, 52    | Hepatitis delta without mention of active hepatitis B    |
|                                                                         | 275.0         | Hemochromatosis                                          |
|                                                                         | 275.1         | Wilson's disease                                         |
|                                                                         | 273.4         | Alpha-1 antitrypsin disease                              |
|                                                                         | 570           | Acute and subacute necrosis of liver                     |
|                                                                         | 571           | Chronic liver disease and cirrhosis                      |
|                                                                         | 572           | Liver abscess and sequelae of chronic liver disease      |
|                                                                         | 573.0-5       | Other disorders of liver                                 |
|                                                                         | 348.3         | Encephalopathy, unspecified                              |
|                                                                         | 349.82        | Toxic encephalopathy                                     |
|                                                                         | 456.0, 20     | Esophageal varices with bleeding                         |
|                                                                         | 456.1, 21     | Esophageal varices without bleeding                      |
|                                                                         | 456.8:1-2     | Bleeding gastric varices                                 |
|                                                                         | 456.8:4-5     | Gastric varices                                          |
|                                                                         | 567.2:9       | Spontaneous bacterial peritonitis                        |
| 789.5                                                                   | Ascites       |                                                          |
| Biliary disease                                                         | 574           | Cholelithiasis                                           |
|                                                                         | 575           | Disorders of gallbladder                                 |
|                                                                         | 576           | Disorders of biliary tract                               |
| Gastrointestinal hemorrhage                                             | 578           | Gastrointestinal hemorrhage                              |
| <b>Diabetes mellitus</b>                                                |               |                                                          |
| Diabetes mellitus                                                       | 250           | Diabetes mellitus                                        |
| <b>Malignant tumour</b>                                                 |               |                                                          |
| Malignant neoplasm                                                      | 140-149       | Malignant neoplasm of lip, oral cavity, and pharynx      |
|                                                                         | 150-159       | Malignant neoplasm of digestive organs and peritoneum    |

|                                                               |         |                                                                     |
|---------------------------------------------------------------|---------|---------------------------------------------------------------------|
|                                                               | 160-165 | Malignant neoplasm of respiratory and intrathoracic organ           |
|                                                               | 170-176 | Malignant neoplasm of bone, connective tissue, skin, and breasts    |
|                                                               | 179-189 | Malignant neoplasm of genitourinary organs                          |
|                                                               | 190-199 | Malignant neoplasm of other and unspecified sites                   |
|                                                               | 200-209 | Malignant neoplasm of lymphatic and hematopoietic tissue            |
|                                                               | 235-238 | Neoplasms of uncertain behavior                                     |
|                                                               | 239     | Neoplasms of unspecified nature                                     |
| Chemotherapy                                                  | V58.1   | Encounter for antineoplastic chemotherapy and immunotherapy         |
|                                                               | V66.2   | Convalescence following chemotherapy                                |
|                                                               | V67.2   | Follow-up examination, following chemotherapy                       |
|                                                               | 99.25   | Injection or infusion of cancer chemotherapeutic substance          |
| History of cancer                                             | V10     | Personal history of cancer                                          |
| Nervous system diseases                                       |         |                                                                     |
| Cerebrovascular events                                        | 430     | Subarachnoid hemorrhage                                             |
|                                                               | 431     | Intracerebral hemorrhage                                            |
|                                                               | 432     | Other and unspecified intracranial hemorrhage                       |
|                                                               | 433     | Occlusion and stenosis of precerebral arteries                      |
|                                                               | 434     | Occlusion of cerebral arteries                                      |
|                                                               | 435     | Transient cerebral ischemia                                         |
|                                                               | 436     | Acute, but ill-defined, cerebrovascular disease                     |
|                                                               | 437     | Other and ill-defined cerebrovascular disease                       |
| Other nervous system disease                                  | 438     | Late effects of cerebrovascular disease                             |
|                                                               | 320-327 | Inflammatory diseases of the central nervous system                 |
|                                                               | 330-337 | Hereditary and degenerative diseases of the central nervous system  |
|                                                               | 340-345 | Other disorders of the central nervous system                       |
| Respiratory diseases                                          |         |                                                                     |
| Pneumonia                                                     | 480     | Viral pneumonia (other than SARS-CoV and SARS-CoV-2)                |
|                                                               | 481     | Pneumococcal pneumonia [ <i>Streptococcus pneumoniae</i> pneumonia] |
|                                                               | 482     | Other bacterial pneumonia                                           |
|                                                               | 483     | Pneumonia due to other specified organism                           |
|                                                               | 484     | Pneumonia in infectious diseases classified elsewhere               |
|                                                               | 485     | Bronchopneumonia, organism unspecified                              |
|                                                               | 486     | Pneumonia, organism unspecified                                     |
| Influenza with respiratory manifestations                     | 487     | Influenza with respiratory manifestations                           |
| Chronic obstructive pulmonary disease and allied conditions   | 490-496 | Chronic obstructive pulmonary disease and allied conditions         |
| Pneumoconioses and other lung diseases due to external agents | 500-508 | Pneumoconioses and other lung diseases due to external agents       |
| Other diseases of respiratory system                          | 510-519 | Other diseases of respiratory system                                |
| Kidney diseases                                               |         |                                                                     |
| Nephritis, nephrotic syndrome, and nephrosis                  | 581     | Nephrotic syndrome                                                  |
|                                                               | 582     | Chronic glomerulonephritis                                          |
|                                                               | 583     | Nephritis and nephropathy not specified as acute or chronic         |
|                                                               | 584     | Acute kidney failure                                                |
|                                                               | 585     | Chronic kidney disease                                              |
|                                                               | 586     | Renal failure, unspecified                                          |
|                                                               | 587     | Renal sclerosis, unspecified                                        |
| Renal replacement therapy                                     | 588     | Disorders resulting from impaired renal function                    |
|                                                               | V56     | Encounter for dialysis and dialysis catheter care                   |
|                                                               | 38.95   | Venous catheterization for renal dialysis                           |

|                                    |         |                                                    |
|------------------------------------|---------|----------------------------------------------------|
|                                    | 39.27   | Arteriovenostomy for renal dialysis                |
|                                    | 39.42   | Revision of arteriovenous shunt for renal dialysis |
|                                    | 39.43   | Removal of arteriovenous shunt for renal dialysis  |
|                                    | 39.95   | Hemodialysis                                       |
|                                    | 54.98   | Peritoneal dialysis                                |
| <hr/>                              |         |                                                    |
| Human immunodeficiency virus (HIV) |         |                                                    |
| HIV                                | 042     | HIV disease.                                       |
| HIV                                | 079.53  | HIV, type 2 [HIV-2]                                |
| HIV                                | V02.9:1 | HIV carrier                                        |
| HIV                                | V08     | Asymptomatic HIV infection status                  |

ICD-9-CM = International Classification of Diseases, Ninth Revision, Clinical Modification.



Supplementary Table 4. Univariate and multivariable analysis with Cox proportional hazards regression on factors associated with mortality in patients with SARS-CoV-2 infection / COVID-19 after multiple imputation.

| Parameters                            | Univariate analysis   |         | Multivariable analysis |         |
|---------------------------------------|-----------------------|---------|------------------------|---------|
|                                       | HR (95% CI)           | P value | aHR (95% CI)           | P value |
| <b>HBV exposure</b>                   |                       |         |                        |         |
| - No HBV                              | Referent              |         |                        |         |
| - Current HBV infection               | 1.10 (0.53 – 2.25)    | 0.802   | 1.29 (0.61 – 2.70)     | 0.507   |
| - Past HBV infection                  | 1.97 (1.23 – 3.15)    | 0.005   | 0.90 (0.56 – 1.46)     | 0.681   |
| <b>Acute liver injury</b>             | 6.87 (4.38 – 10.78)   | <0.001  | 2.45 (1.52 – 3.96)     | <0.001  |
| <b>Liver cirrhosis</b>                | 4.35 (2.29 – 8.29)    | <0.001  | 2.08 (1.05 – 4.11)     | 0.036   |
| <b>Age (per years)</b>                | 1.11 (1.09 – 1.12)    | <0.001  | 1.09 (1.08 – 1.11)     | <0.001  |
| <b>Male sex</b>                       | 1.17 (0.83 – 1.64)    | 0.362   |                        |         |
| <b>Circulatory system disease</b>     | 11.17 (6.62 – 18.87)  | <0.001  |                        |         |
| <b>Diabetes mellitus</b>              | 6.00 (4.13 – 8.72)    | <0.001  | 1.59 (1.06 – 2.39)     | 0.024   |
| <b>Malignant tumor</b>                | 5.40 (3.60 – 8.11)    | <0.001  |                        |         |
| <b>Nervous system disease</b>         | 4.98 (3.42 – 7.25)    | <0.001  | 2.30 (1.56 – 3.39)     | <0.001  |
| <b>Respiratory disease</b>            | 3.93 (2.62 – 5.89)    | <0.001  |                        |         |
| <b>Kidney disease</b>                 | 7.42 (4.96 – 11.10)   | <0.001  | 2.00 (1.32 – 3.04)     | 0.001   |
| <b>Creatinine</b>                     | 1.002 (1.002 – 1.003) | <0.001  |                        |         |
| <b>Albumin</b>                        | 0.88 (0.86 – 0.90)    | <0.001  |                        |         |
| <b>Lactate dehydrogenase</b>          | 1.003 (1.002 – 1.004) | <0.001  | 1.002 (1.001 – 1.003)  | 0.002   |
| <b>C-reactive protein</b>             | 1.08 (1.06 – 1.10)    | <0.001  |                        |         |
| <b>Hemoglobin</b>                     | 0.70 (0.65 – 0.75)    | <0.001  | 0.90 (0.83 – 0.98)     | 0.018   |
| <b>Neutrophil-to-lymphocyte ratio</b> | 1.07 (1.06 – 1.08)    | <0.001  | 1.04 (1.03 – 1.06)     | <0.001  |
| <b>Platelet</b>                       | 0.998 (0.995 – 1.000) | 0.071   |                        |         |

Patients were followed from the date of COVID-19 diagnosis to the date of discharge, the last follow-up date (20 January 2021), or date of death, whichever came first.

Acute liver injury was defined as alanine aminotransferase and/or aspartate aminotransferase  $\geq 2 \times$ ULN, with total bilirubin  $\geq 2 \times$ ULN and/or international normalized ratio  $\geq 1.7$ .

aHR = adjusted hazard ratio; CI = confidence interval; COVID-19 = coronavirus disease 2019; SARS-CoV-2 = severe acute respiratory syndrome coronavirus 2; ULN = upper limit of normal.

Supplementary Table 5. Liver-related outcomes during COVID-19/ SARS-CoV-2 infection.

| <b>Clinical outcomes</b>          | <b>No HBV<br/>N = 4,927</b> | <b>Current HBV infection<br/>N = 353</b> | <b>Past HBV infection<br/>N = 359</b> |
|-----------------------------------|-----------------------------|------------------------------------------|---------------------------------------|
| Any hepatic events                | 5 (0.2)                     | 1 (0.3)                                  | 4 (1.1)                               |
| Median days to hepatic events     | 14                          | 5                                        | 22.5                                  |
| Liver failure <sup>^</sup>        | 10 (0.2)                    | 1 (0.3)                                  | 3 (0.8)                               |
| Hepatocellular carcinoma          | 0 (0)                       | 1 (0.3)                                  | 1 (0.3)                               |
| Ascites                           | 0 (0)                       | 0 (0)                                    | 0 (0)                                 |
| Nonbleeding varices               | 0 (0)                       | 0 (0)                                    | 0 (0)                                 |
| Variceal bleeding                 | 0 (0)                       | 0 (0)                                    | 0 (0)                                 |
| Hepatic encephalopathy            | 0 (0)                       | 0 (0)                                    | 0 (0)                                 |
| Hepatorenal syndrome              | 0 (0)                       | 0 (0)                                    | 0 (0)                                 |
| Spontaneous bacterial peritonitis | 0 (0)                       | 0 (0)                                    | 0 (0)                                 |
| Liver-related death               | 0 (0)                       | 0 (0)                                    | 0 (0)                                 |

\* Five patients were not included due to history of hepatic events before SARS-CoV infection.

<sup>^</sup> Liver failure was defined by diagnosis codes and/or serum total bilirubin  $\geq 2$ x upper limit of normal and INR  $\geq 1.7$ . The upper limit of normal of total bilirubin was 19  $\mu\text{mol/L}$  (*i.e.* 1.1 mg/mL). COVID-19 = coronavirus disease 2019, SARS-CoV-2 = severe acute respiratory syndrome coronavirus 2.

Supplementary Table 6. Baseline clinical characteristics of patients with SARS-CoV-2 infection / COVID-19 who had or did not receive HBV antiviral treatment.

| Clinical characteristics                   | No HBV antiviral treatment<br>N = 5,406 | With HBV antiviral treatment<br>N = 233 | P value |
|--------------------------------------------|-----------------------------------------|-----------------------------------------|---------|
| Age (years)                                | 50.2 ± 18.1                             | 63.3 ± 13.4                             | <0.001  |
| Male gender (n, %)                         | 2590 (47.9)                             | 153 (65.7)                              | <0.001  |
| HBV exposure                               |                                         |                                         | <0.001  |
| - No HBV                                   | 4,856 (89.8)                            | 71 (30.5)                               |         |
| - Current HBV infection                    | 231 (4.3)                               | 122 (52.4)                              |         |
| - Past HBV infection                       | 319 (5.9)                               | 40 (17.2)                               |         |
| Liver cirrhosis (n, %)                     | 58 (1.1)                                | 21 (9.0)                                | <0.001  |
| Albumin (g/L)                              | 40.1 ± 5.2                              | 37.3 ± 5.6                              | <0.001  |
| Missing (%)                                | 0.1                                     | 0                                       |         |
| Total bilirubin (mg/dL)                    | 0.5 ± 0.3                               | 0.6 ± 0.5                               | 0.028   |
| Missing (%)                                | 0.1                                     | 0                                       |         |
| Alanine aminotransferase (U/L)             | 25 (17-39)                              | 29 (19-42)                              | 0.001   |
| Missing (%)                                | 0.1                                     | 0                                       |         |
| Aspartate aminotransferase (U/L)           | 30 (22-47)                              | 42 (27-67)                              | <0.001  |
| Missing (%)                                | 67.8                                    | 37.3                                    |         |
| Alkaline phosphatase (xULN)                | 0.6 (0.5-0.7)                           | 0.5 (0.4-0.7)                           | 0.052   |
| Missing (%)                                | 0.1                                     | 0                                       |         |
| International normalized ratio             | 1.1 ± 0.2                               | 1.1 ± 0.2                               | 0.095   |
| Missing (%)                                | 33.4                                    | 21.0                                    |         |
| Creatinine (μmol/L)                        | 70.0 (59.0-84.0)                        | 79.0 (66.0-95.0)                        | <0.001  |
| Missing (%)                                | 0.1                                     | 0                                       |         |
| C-reactive protein (mg/dL)                 | 1.9 ± 3.6                               | 4.0 ± 5.5                               | <0.001  |
| Missing (%)                                | 1.0                                     | 0.4                                     |         |
| Lactate dehydrogenase (U/L)                | 220.4 ± 90.1                            | 280.2 ± 132.4                           | <0.001  |
| Missing (%)                                | 1.2                                     | 0.4                                     |         |
| Hemoglobin (g/dL)                          | 13.5 ± 1.7                              | 13.6 ± 1.7                              | 0.632   |
| Missing (%)                                | 0.04                                    | 0                                       |         |
| WCC (x10 <sup>9</sup> /L)                  | 5.7 ± 2.2                               | 5.7 ± 2.7                               | 0.861   |
| WCC <3.5x10 <sup>9</sup> /L (n, %)         | 605 (11.2)                              | 25 (10.7)                               | 0.825   |
| Missing (%)                                | 0.04                                    | 0                                       |         |
| Neutrophil (x10 <sup>9</sup> /L)           | 3.7 ± 1.9                               | 4.0 ± 2.6                               | 0.061   |
| Missing (%)                                | 0.4                                     | 0                                       |         |
| Lymphocyte (x10 <sup>9</sup> /L)           | 1.3 ± 0.8                               | 1.1 ± 0.5                               | <0.001  |
| Lymphocyte <1x10 <sup>9</sup> /L (n, %)    | 1730 (32.1)                             | 123 (52.8)                              | <0.001  |
| Missing (%)                                | 0.4                                     | 0                                       |         |
| Neutrophil-to-lymphocyte ratio             | 3.5 ± 3.1                               | 5.2 ± 7.2                               | <0.001  |
| Missing (%)                                | 0.4                                     | 0                                       |         |
| Platelet (x10 <sup>9</sup> /L)             | 217.4 ± 74.1                            | 177.4 ± 60.5                            | <0.001  |
| Platelet <150x10 <sup>9</sup> /L (n, %)    | 872 (16.1)                              | 85 (36.5)                               | <0.001  |
| Missing (%)                                | 0.04                                    | 0                                       |         |
| <b>Comorbidities (n, %)</b>                |                                         |                                         |         |
| Circulatory system disease                 | 1,692 (31.3)                            | 124 (53.2)                              | <0.001  |
| Diabetes mellitus                          | 1,077 (19.9)                            | 102 (43.8)                              | <0.001  |
| Malignant tumor                            | 215 (4.0)                               | 29 (12.4)                               | <0.001  |
| Nervous system disease                     | 247 (4.6)                               | 17 (7.3)                                | 0.054   |
| Respiratory disease                        | 219 (4.1)                               | 18 (7.7)                                | 0.006   |
| Kidney disease                             | 127 (2.3)                               | 11 (4.7)                                | 0.022   |
| HIV infection                              | 8 (0.1)                                 | 1 (0.4)                                 | 0.316   |
| <b>Medications during follow-up (n, %)</b> |                                         |                                         |         |
| Oseltamivir                                | 80 (1.5)                                | 6 (2.6)                                 | 0.170   |

|                                                  |              |            |        |
|--------------------------------------------------|--------------|------------|--------|
| Ribavirin                                        | 1,609 (29.8) | 94 (40.3)  | 0.001  |
| Lopinavir-ritonavir                              | 1,687 (31.2) | 70 (30.0)  | 0.707  |
| Interferon beta                                  | 2,560 (47.4) | 154 (66.1) | <0.001 |
| Remdesivir                                       | 438 (8.1)    | 38 (16.3)  | <0.001 |
| Antibiotic treatment                             | 2,329 (43.1) | 173 (74.2) | <0.001 |
| Antifungal treatment                             | 38 (0.7)     | 6 (2.6)    | 0.009  |
| Corticosteroid                                   | 1,109 (20.5) | 161 (69.1) | <0.001 |
| Dexamethasone                                    | 1,016 (18.8) | 157 (67.4) | <0.001 |
| Hydrocortisone                                   | 135 (2.5)    | 17 (7.3)   | <0.001 |
| Prednisolone                                     | 68 (1.3)     | 8 (3.4)    | 0.013  |
| Methylprednisolone                               | 7 (0.1)      | 1 (0.4)    | 0.287  |
| Peak daily dose<br>(prednisolone equivalent, mg) | 45 (45-45)   | 45 (45-75) | <0.001 |
| Duration (days)                                  | 9 (6-13)     | 12 (9-19)  | <0.001 |
| Intravenous immunoglobulin therapy               | 6 (0.1)      | 2 (0.9)    | 0.040  |
| <b>Clinical outcomes in 60 days (n, %)</b>       |              |            |        |
| Acute liver injury                               | 64 (1.2)     | 13 (5.6)   | <0.001 |
| Mortality                                        | 120 (2.2)    | 18 (7.7)   | <0.001 |
| <b>Follow-up duration (days)</b>                 | 13 (9-20)    | 19 (13-29) | <0.001 |

All concomitant medications were represented as binary parameters. Percentages were computed based on non-missing values. Categorical variables were presented as number (percentage). Median age, alanine aminotransferase and follow-up duration were expressed in median (interquartile range), whereas other continuous variables were expressed in mean  $\pm$  standard deviation. Qualitative and quantitative differences between subgroups were analyzed by Chi-square or Fisher's exact tests for categorical parameters and Student's *t* test or Mann-Whitney *U* test for continuous parameters, as appropriate.

COVID-19 = coronavirus disease 2019; HBsAg = hepatitis B surface antigen; HBV = hepatitis B virus; HIV = human immunodeficiency virus infection, ICU = intensive care unit; SARS-CoV-2 = severe acute respiratory syndrome coronavirus 2; ULN = upper limit of normal; WCC = white cell count.

Supplementary Figure 1A. Serial alanine aminotransferase (ALT) of patients with SARS-CoV-2 infection / COVID-19 who had had no HBV, current and past HBV infection.  
COVID-19 = coronavirus disease 2019, HBV = hepatitis B virus, SARS-CoV-2 = severe acute respiratory syndrome coronavirus 2.

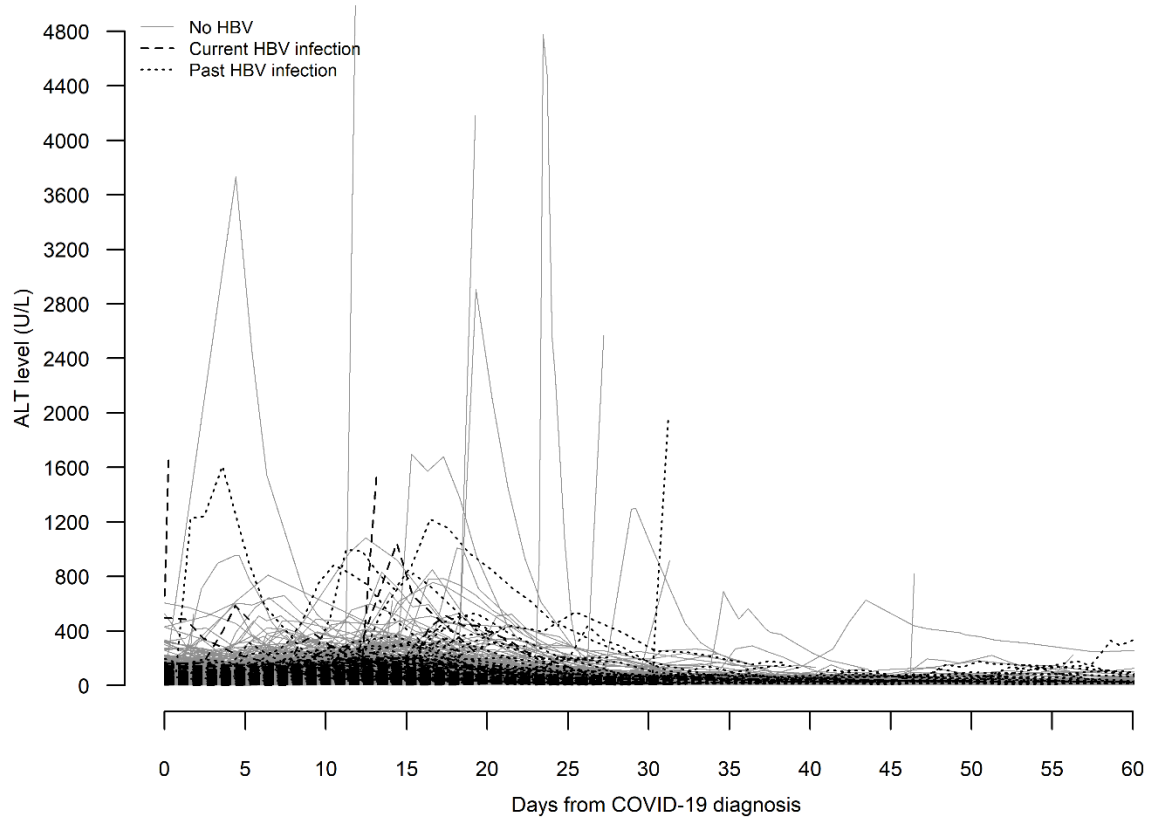

Supplementary Figure 1B. Serial total bilirubin of patients with SARS-CoV-2 infection / COVID-19 who had had no HBV, current and past HBV infection.

COVID-19 = coronavirus disease 2019, HBV = hepatitis B virus, SARS-CoV-2 = severe acute respiratory syndrome coronavirus 2.

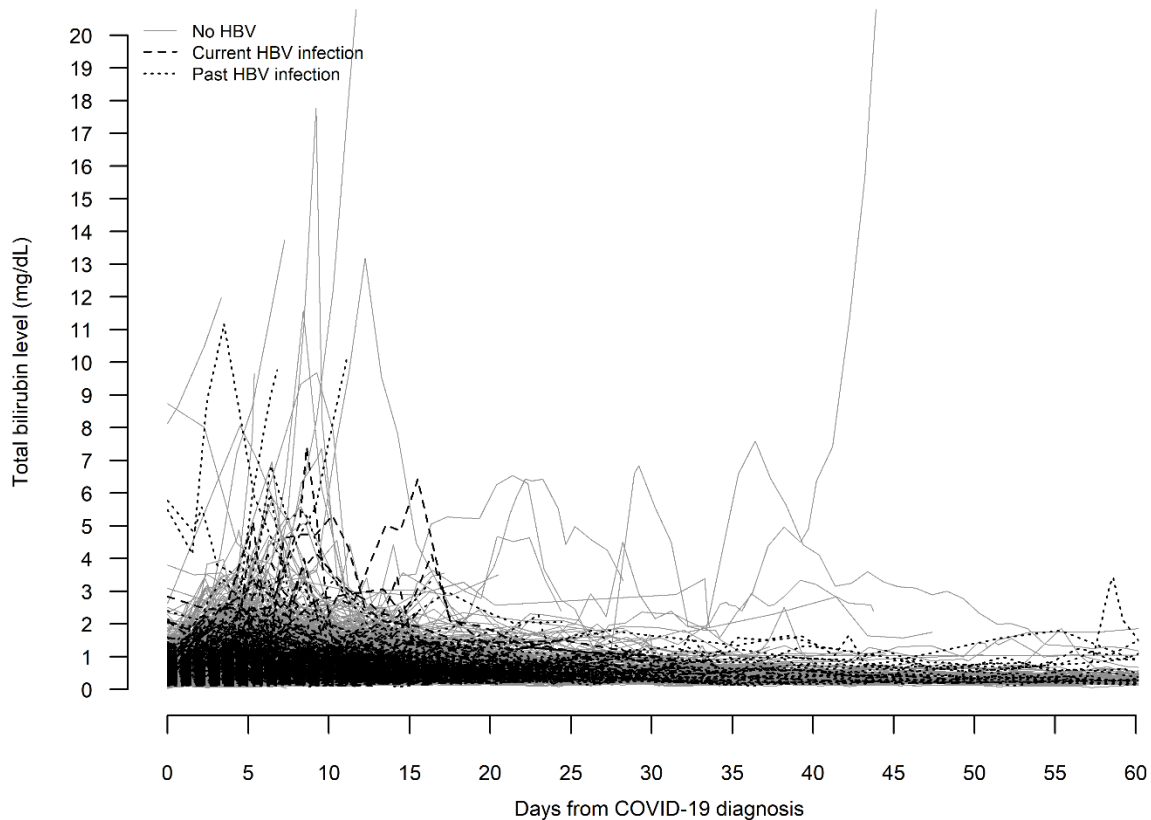

Supplement: HEP-74-1750-s001.pdf [file HEP-74-1750-s001.pdf]
